# Supplementary material for: Dielectric relaxation of nonaqueous ionic liquid microemulsions: polarization, microstructure, and phase transition
Source: Royal Society of Chemistry journal article supplement (doi:10.1039/c7ra00573c), 2017-01-01
Supplement: c7ra00573c1.pdf [file c7ra00573c1.pdf]

## Dielectric measurements

The measurement was conducted under constant temperature condition. The low-frequency dielectric measurement of the two microemulsion systems were performed on a 4294A precision impedance analyzer (Agilent Technologies, made in Japan) that allows a continuous frequency measurement from 40 Hz to 110 MHz. After calibration and test, the voltage applied to the AC electric field was 500 mV. A dielectric measurement cell with concentric cylindrical platinum electrodes [38] was employed and connected to the impedance analyzer by a 16047E spring clip fixture (Agilent Technologies, made in Japan). The original data capacitance  $C$  and conductance  $G$ , obtained from measurements, which was corrected by the measured parameters such as cell constant  $C_l$ , the stray capacitance  $C_r$  and the residual inductance  $L_r$  (obtained by using ethanol, water, and KCl solution) according to Schwan's method. The permittivity  $\varepsilon$  and the conductivity  $\kappa$  were calculated according to  $\varepsilon = (C - C_r)/C_l$  and  $\kappa = G\varepsilon_0/C_l$ , ( $\varepsilon_0 (= 8.854 \times 10^{-12} \text{F/m})$  is permittivity of vacuum). The numerical value of the DC conductivity was read from the low frequency platform in the dependence graph of the conductivity on the frequency.

## Determination of relaxation parameters

Dielectric relaxation can be characterized by a series of dielectric parameters, which can be obtained by fitting the experimental data with the Havriliak-Negami equation [1].

$$\varepsilon^*(\omega) = \varepsilon' - j\varepsilon'' = \varepsilon_h + \sum_i \frac{\Delta\varepsilon_i}{(1 + (j\omega\tau_i)^{\alpha_i})^{\beta_i}} \quad (1)$$

where  $\varepsilon'' = (\kappa - \kappa_l)/\omega\varepsilon_0$ ,  $\kappa_l$  is the low-frequency limit of conductivity,  $\varepsilon_h$  is the high-frequency limit of relative permittivity,  $i$  is the number of relaxation,  $\Delta\varepsilon$  is the relaxation intensity,  $\omega (= 2\pi f, f$  is measuring frequency) is the angular frequency,  $\tau (= 1/2\pi f_0, f_0$  is relaxation frequency) is the relaxation time,  $\alpha$  ( $0 < \alpha \leq 1$ ) and  $\beta$  ( $0 < \beta \leq 1$ ) both are parameters related to the distribution of relaxation time. The curve-fitting was carried out with the Levenberg Marquardt method to minimize the sum of the residuals for the real part  $\varepsilon'$  and the imaginary part  $\varepsilon''$  of the complex permittivity :

$$\chi = \sum_i [\varepsilon'_e(\omega_i) - \varepsilon'_t(\omega_i)]^2 + \sum_i [\varepsilon''_e(\omega_i) - \varepsilon''_t(\omega_i)]^2 \quad (2)$$

where the subscripts e and t respectively refer to experimental and theoretical values, and  $\omega_i$  is  $i$  th angular frequency.

## References:

1. Hanai, T.; Imakita, T.; Koizumi, N., Analysis of dielectric relaxations of w/o emulsions in the

---

light of theories of interfacial polarization. *Colloid and Polymer Science* **1982**, 260, (11), 1029-1034.
